# Supplementary material for: Accurate immune repertoire sequencing reveals malaria infection driven antibody lineage diversification in young children
Source: PubMed Central journal article supplement (PMC5599618; doi:10.1038/s41467-017-00645-x), 2017-09-14
Supplement: 41467_2017_645_MOESM1_ESM.pdf [file 41467_2017_645_MOESM1_ESM.pdf]

## Supplementary Figures

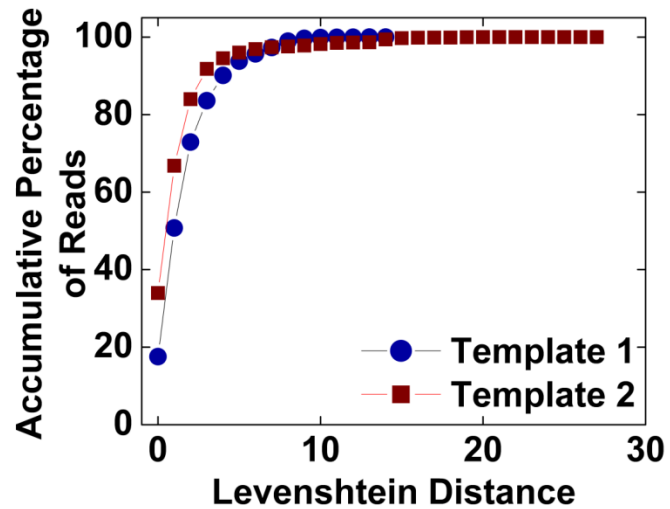

**Supplementary Figure 1** Cumulative distribution of reads as a function of Levenshtein distance between RNA control templates and sequencing reads. The lengths of control templates and reads were 150bp. More than 99% of reads are similar to control templates under the Levenshtein distance of 23. Therefore we set the sub-group clustering threshold as 15% of the read length.

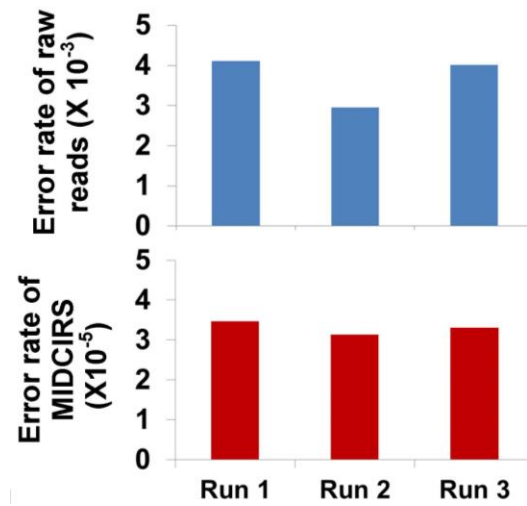

**Supplementary Figure 2** Comparison between raw error rate and improved error rate after using MIDCIRS. Raw reads error rates (top, blue) and MIDCIRS consensus error rates (bottom, red) for 3 Miseq runs, calculated as described in **Methods**.

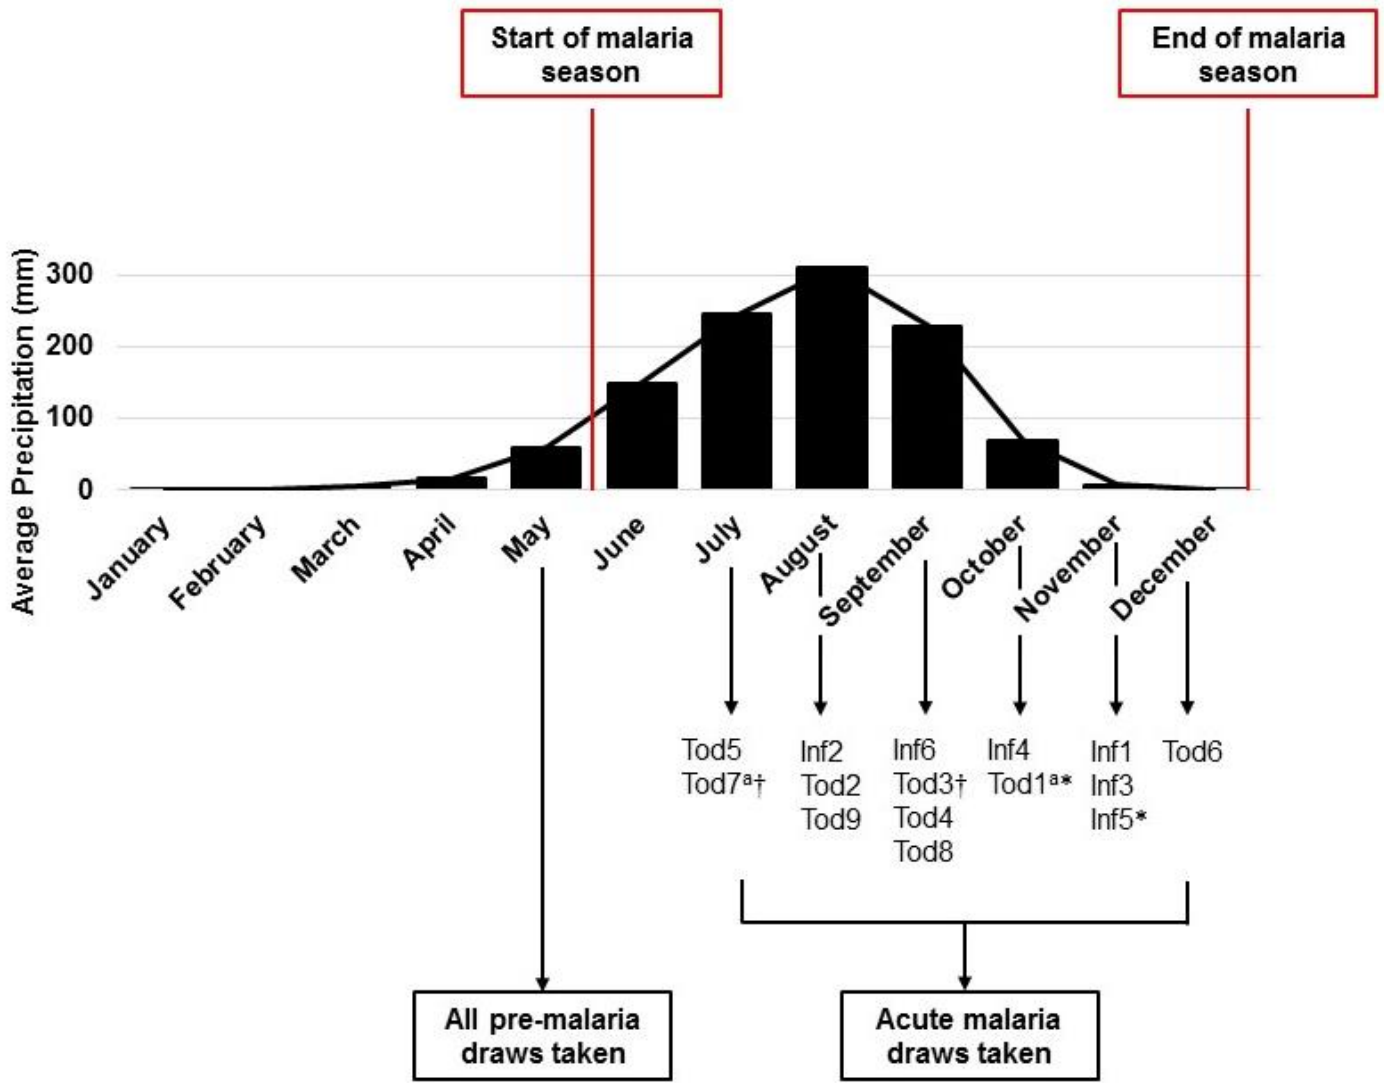

**Supplementary Figure 3** Sample collection timeline. All pre-malaria blood draws were taken in May, just before the start of the rainy season. Acute malaria blood draws were taken 7 days after the onset of acute febrile malaria. Unless otherwise indicated (<sup>a</sup>), all samples were collected during 2011. Average precipitation was estimated from the neighboring city of Bamako, Mali (climatemps.com).

\* Same individual

† Same individual

<sup>a</sup> Drawn in 2012

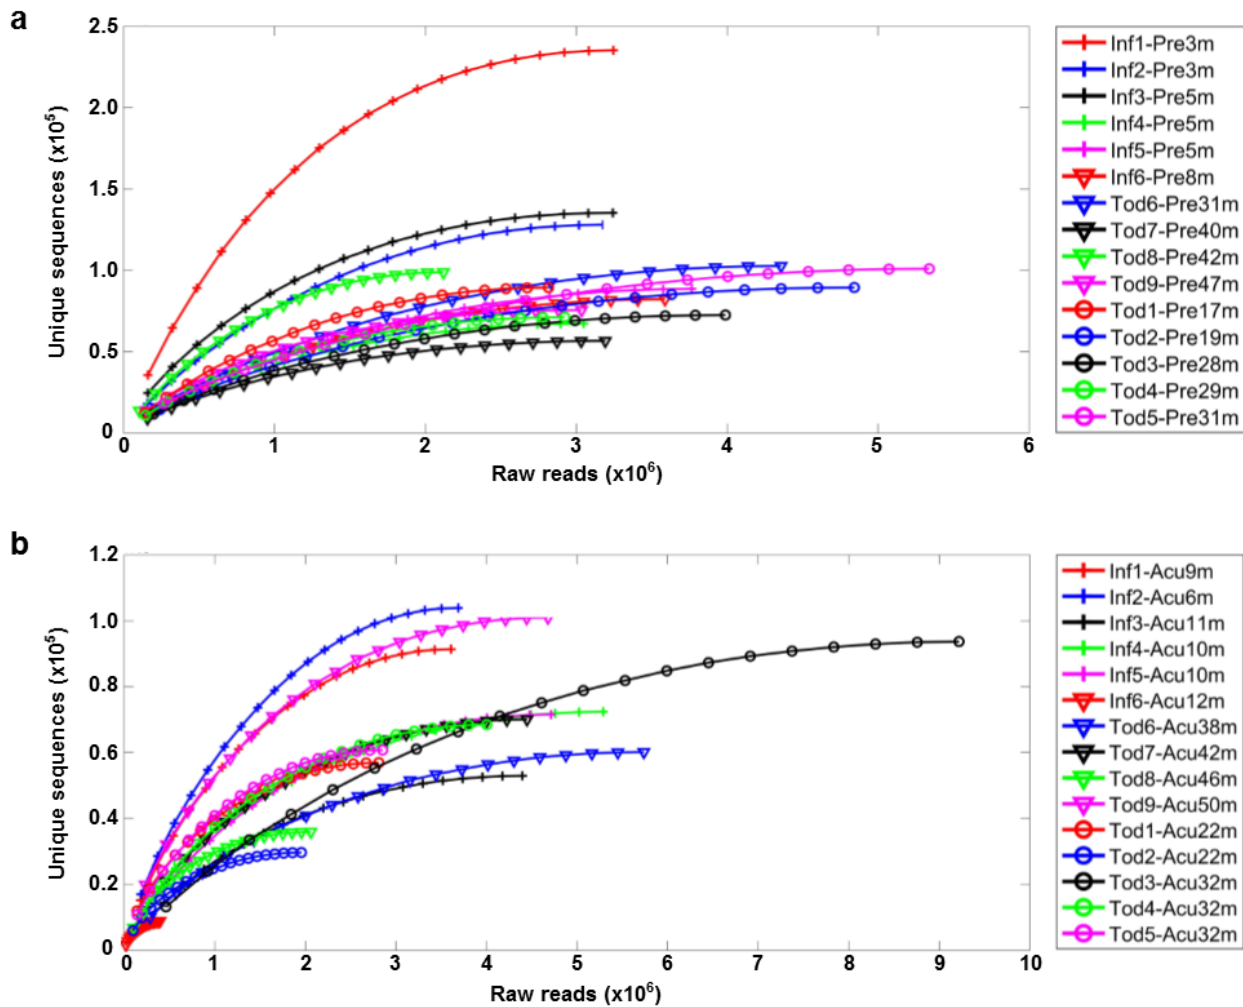

**Supplementary Figure 4** Rarefaction analysis of paired PBMC malaria cohort sequencing libraries. **(a)** Pre-malaria PBMC rarefaction curves (N=15). **(b)** Acute malaria PBMC rarefaction curves (N=15). Raw reads were subsampled to varying depths, and MIDCIRS was used to determine the number of unique RNA molecules. All single-read sequences that occurred before subsampling were discarded. Single-read sequences that occurred as a results of subsampling were included as unique RNA molecules. The number of unique RNA molecules discovered saturated for all samples, indicating adequate sequencing depth.

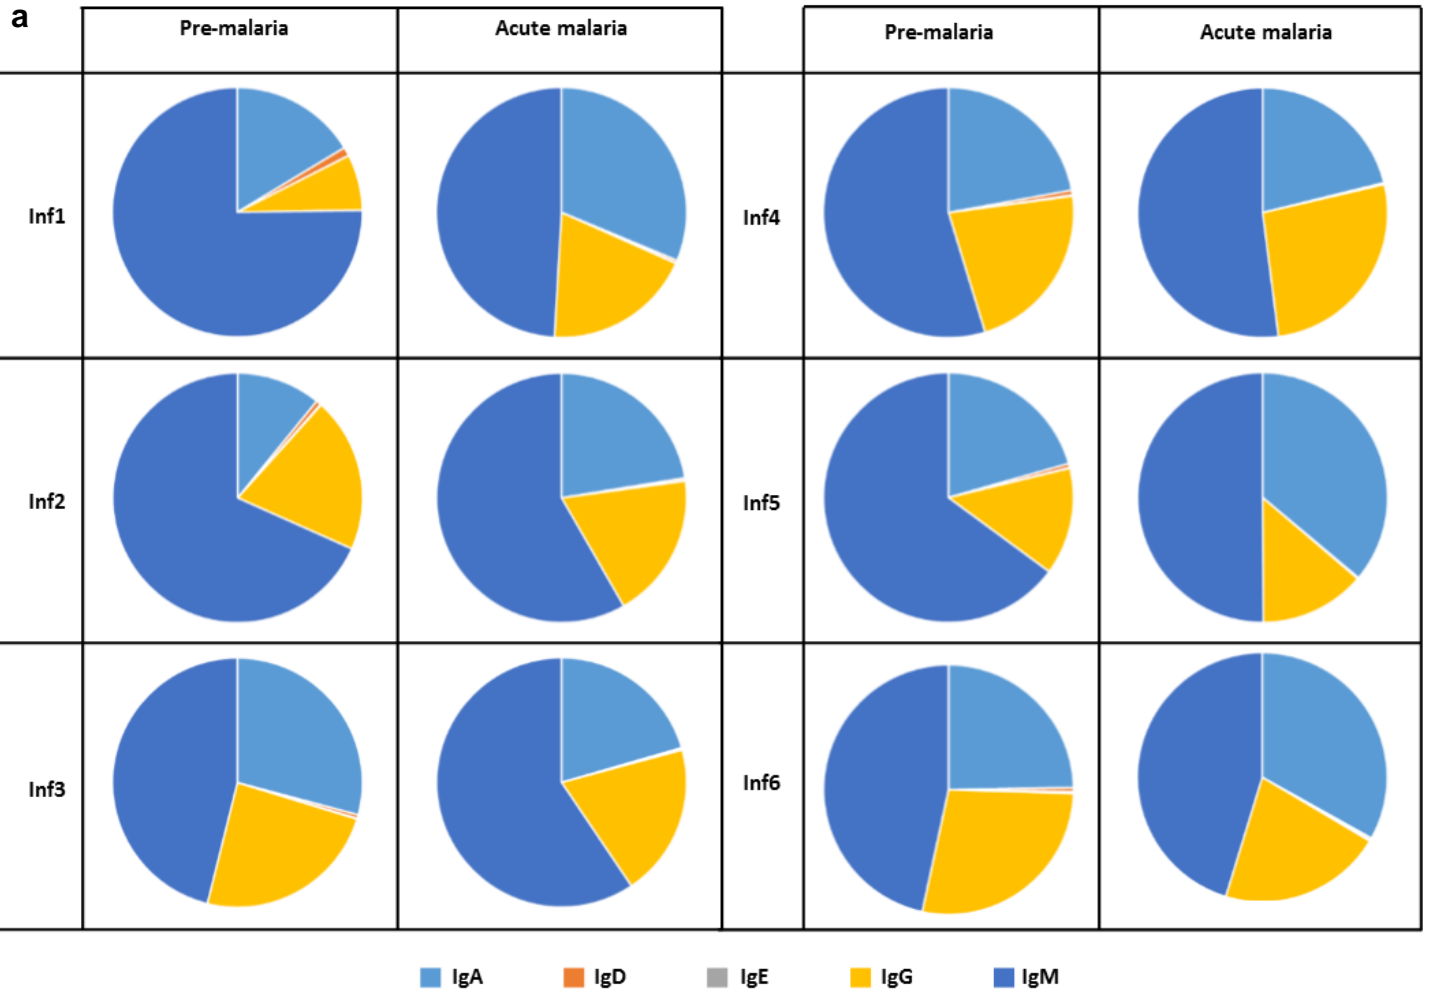

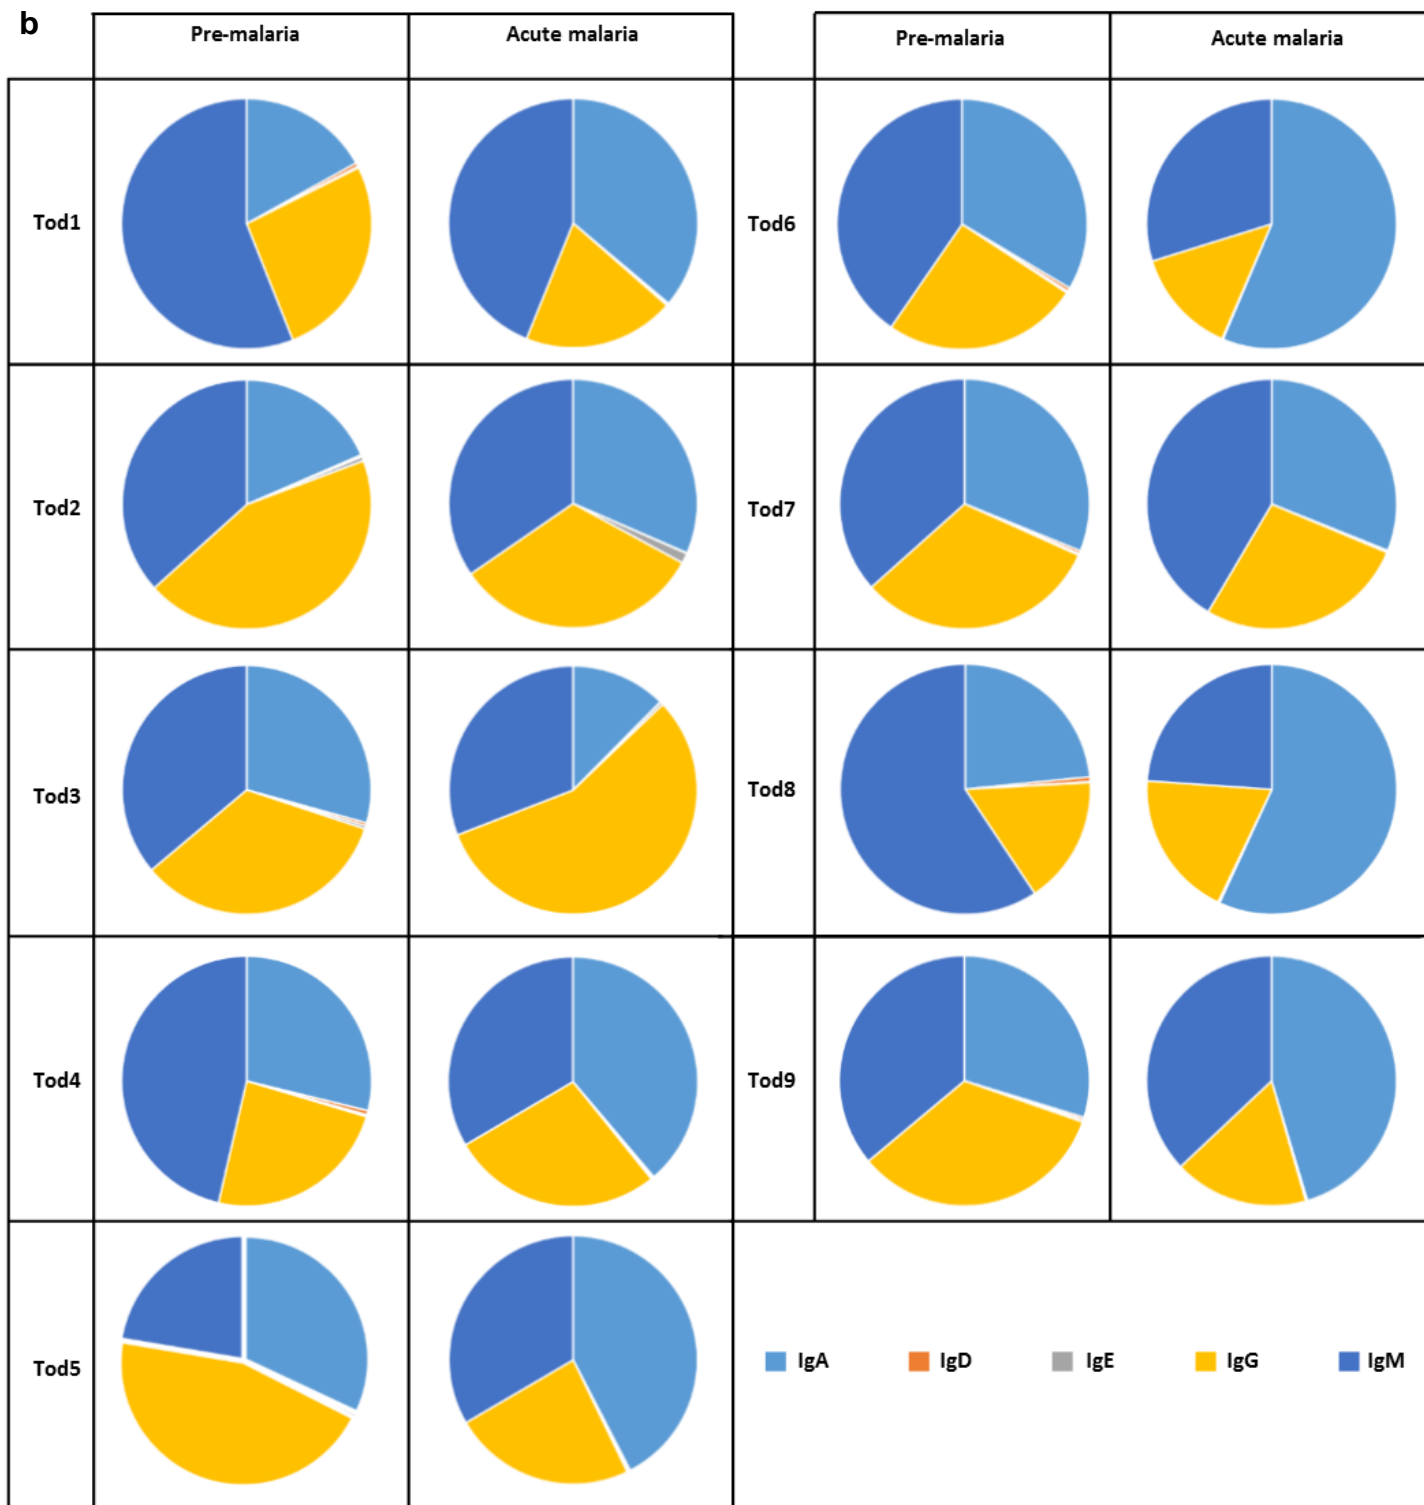

**Supplementary Figure 5** Antibody isotype distribution for infants and toddlers. Antibody isotypes were assigned based on the portion of the constant region sequenced for infants (**a**) and toddlers (**b**). Isotype distribution was weighted on the number of RNA molecules.

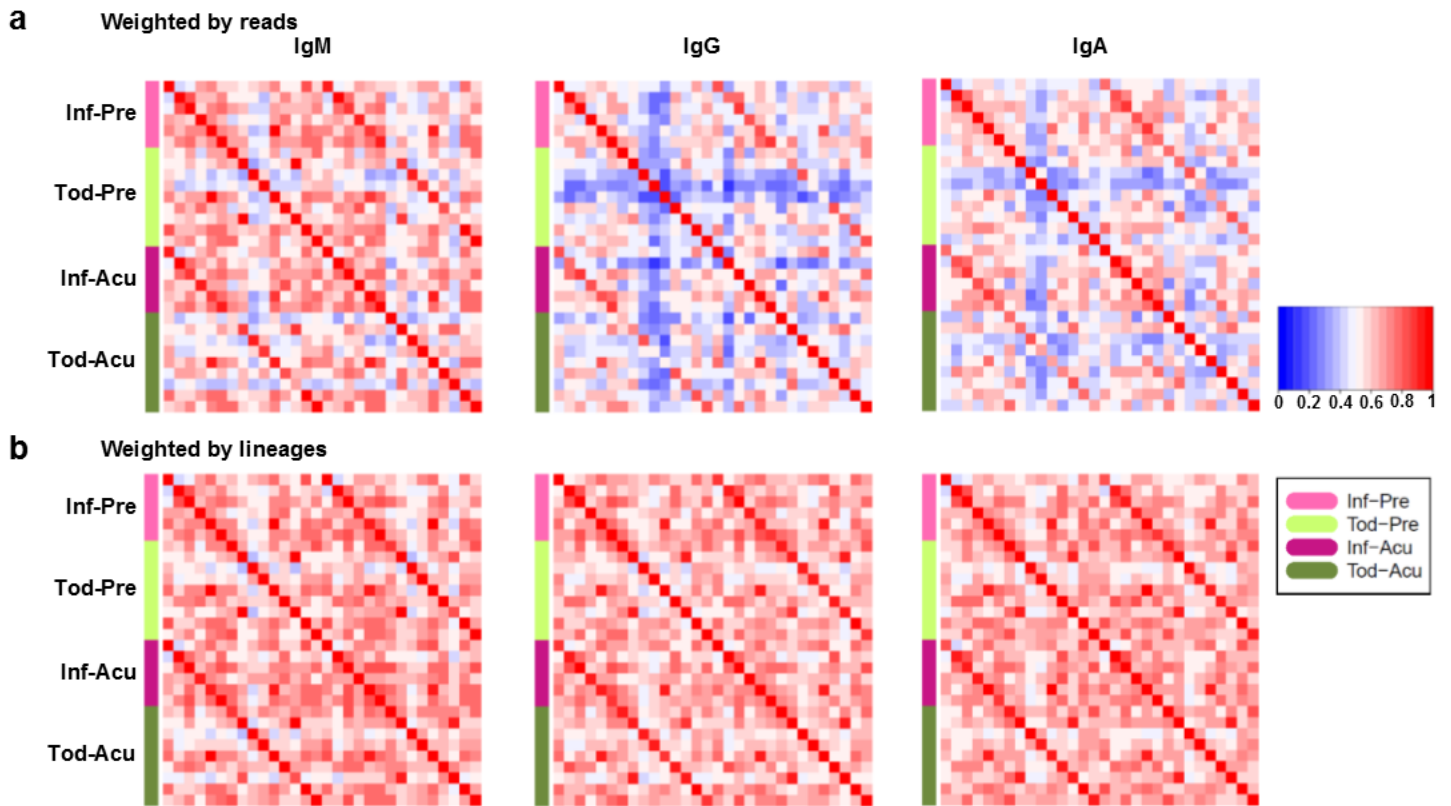

**Supplementary Figure 6** Correlation between VDJ usage in paired PBMCs samples (N=15 pairs of pre-malaria and acute malaria). Correlations weighted by reads (**a**) or by lineage (**b**). The color bar left of each panel as well as in figure legend indicates the sample group: infant pre-malaria (pink), toddler pre-malaria (light green), infant acute malaria (maroon), and toddler acute malaria (dark green). Color indicates strength of Pearson correlation. The diagonal lines in each panel indicate same sample self-correlation; two shorter off-diagonal lines indicate correlations from two timepoints of the same individual.

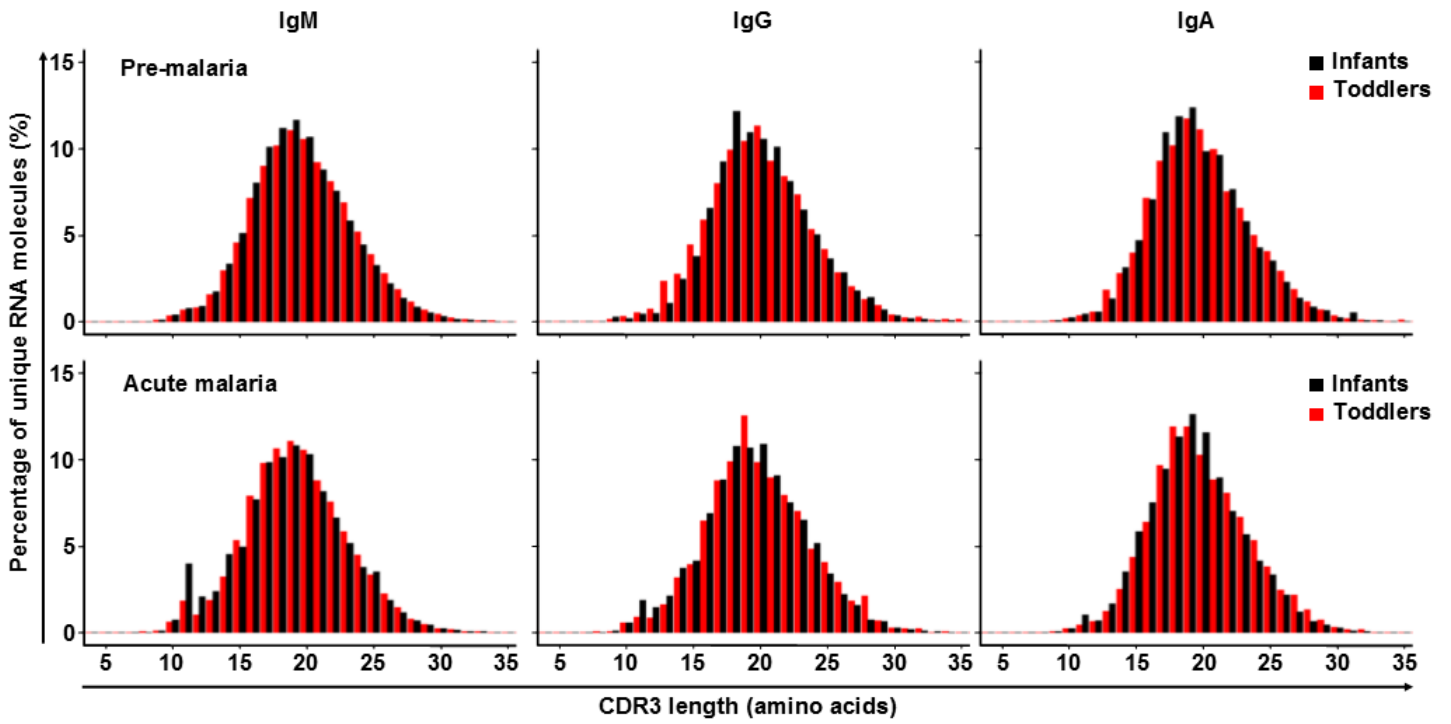

**Supplementary Figure 7** CDR3 amino acid lengths of infants (black, N=6) and toddlers (red, N=9) at pre-malaria (top) and acute malaria (bottom) timepoints, separated by isotype.



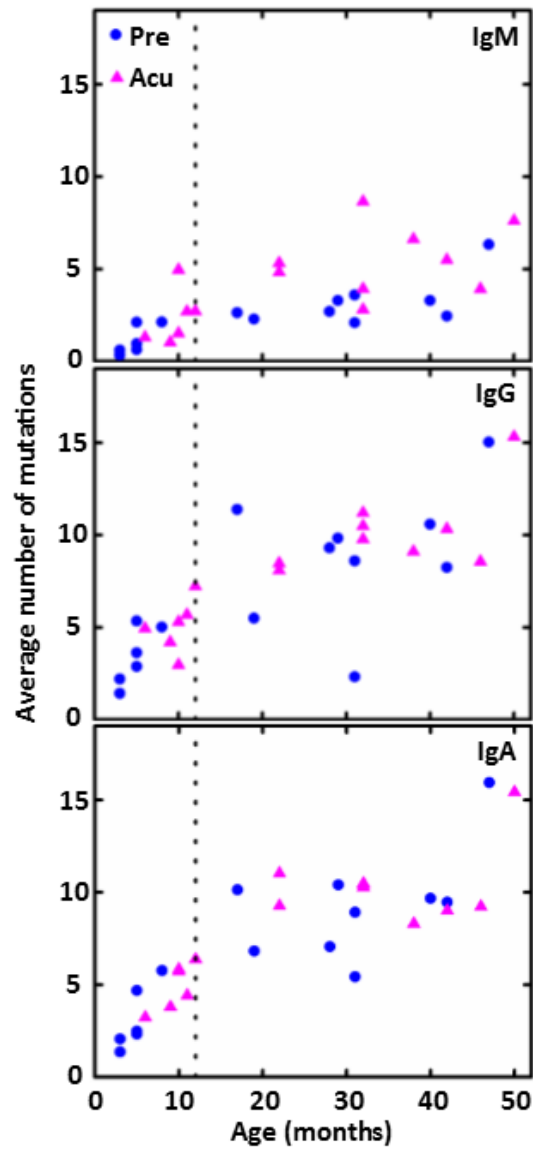

**Supplementary Figure 8** Correlation between average number of mutations and age for initial, paired pre- and acute malaria samples. Initial samples (N=15) suggested a step-wise increase in SHM load around 12 months which prompted us to divide our cohort into two age groups and delve further into the antibody repertoire properties. We have since added 9 pre-malaria samples around the transition, 11 months to 17 months, which were shown in **Fig. 2b**.

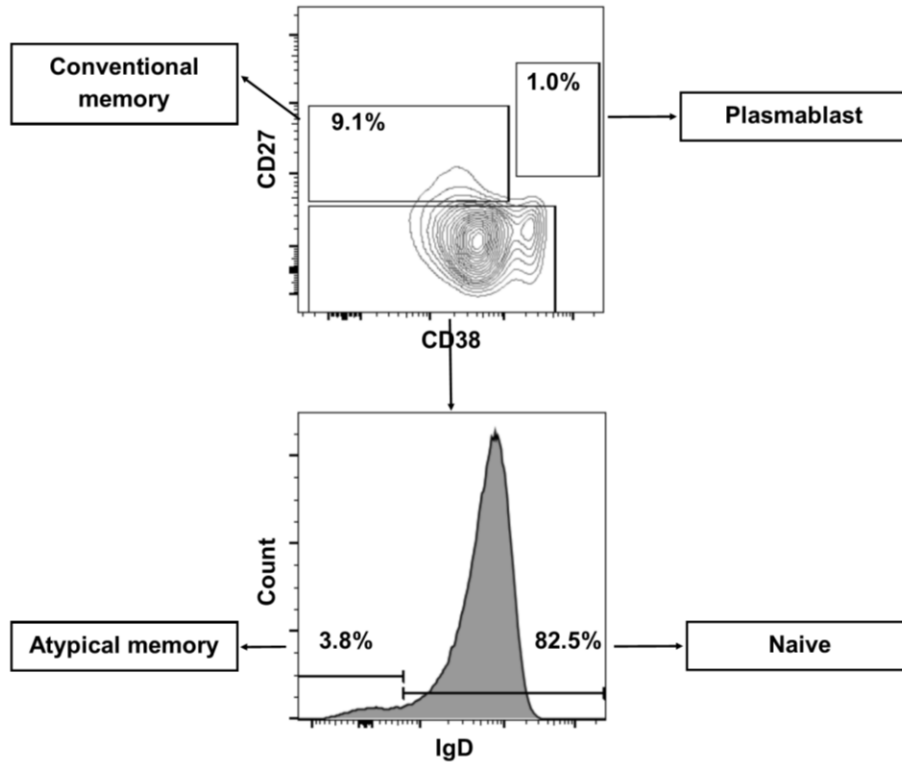

**Supplementary Figure 9** Flow cytometry B cell gating and atypical memory percentage. B cells were first gated by scatter, then live, dump (CD4, CD8, CD14, CD56) negative, and then CD19<sup>+</sup>. Conventional memory B cells (CD20<sup>+</sup>CD27<sup>+</sup>), plasmablasts (CD27<sup>bright</sup>CD38<sup>bright</sup>), and naïve B cells (CD20<sup>+</sup>CD27<sup>-</sup>CD38<sup>low</sup>) were gated for further analysis. Atypical memory B cells (CD20<sup>+</sup>CD27<sup>-</sup>CD38<sup>low</sup>IgD<sup>-</sup>) make up a minor portion of the naïve-like B cells. Percentage of total B cells is displayed for each subpopulation.

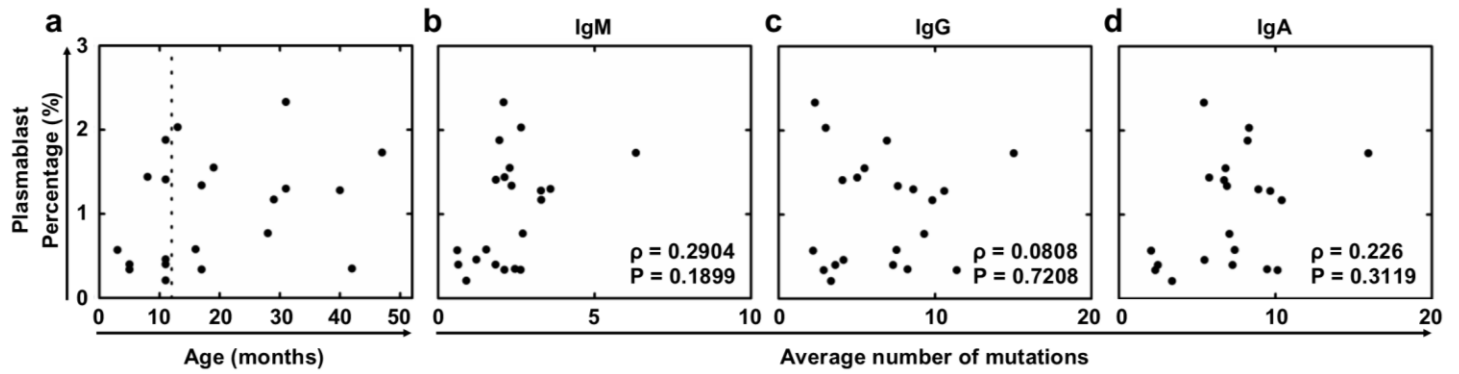

**Supplementary Figure 10** Comparison between pre-malaria plasmablast percentage of total B cells and average number of mutations. (a) Plasmablast percentages of total B cells compared with age. (b-d) Plasmablast percentages of total B cells compared with average number of mutations of IgM (b), IgG (c), and IgA (d) sequences from bulk PBMCs in pre-malaria samples from infants (N=9) and toddlers (N=13).  $\rho$  and  $P$  values determined by Spearman's rank correlation have been listed in the figure.

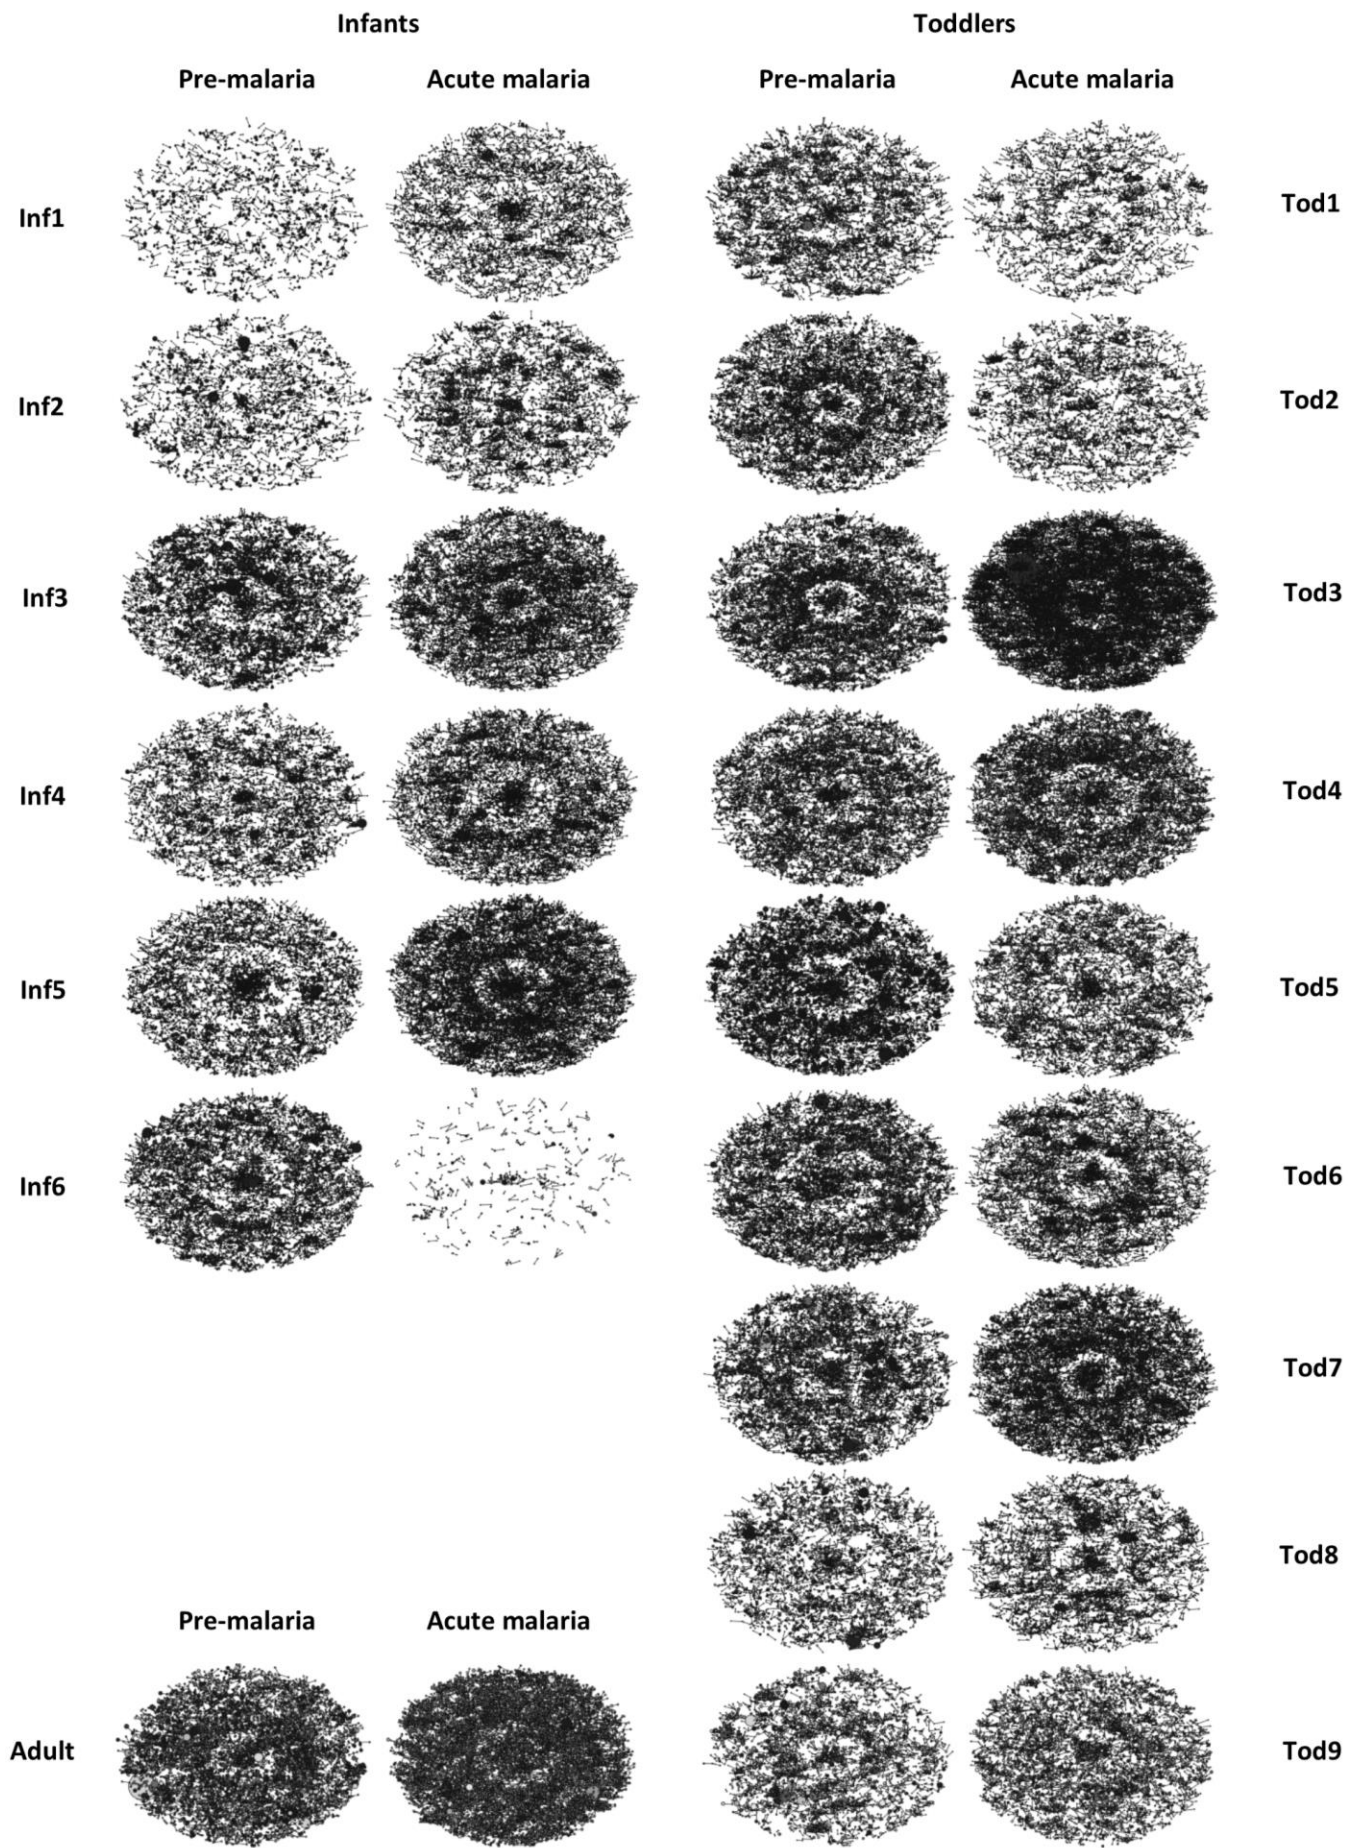

**Supplementary Figure 11** Lineage structure visualization. Lineage distribution structures for pre-malaria and acute malaria samples for all individuals with corresponding pre-malaria and acute malaria PBMC samples. A 24 year old adult malaria patient was also included. Lineages composed of only a single unique RNA molecule were excluded. Clonal lineages shown in **Fig 5b,c** are densely packed here. Therefore, it is not intended to show intra-lineage structure for all individual lineages in each panel; rather, each panel provides an overview of all lineages for one individual at one timepoint. The darker the cluster in each oval-shaped global lineage map, the more densely packed lineages there are.

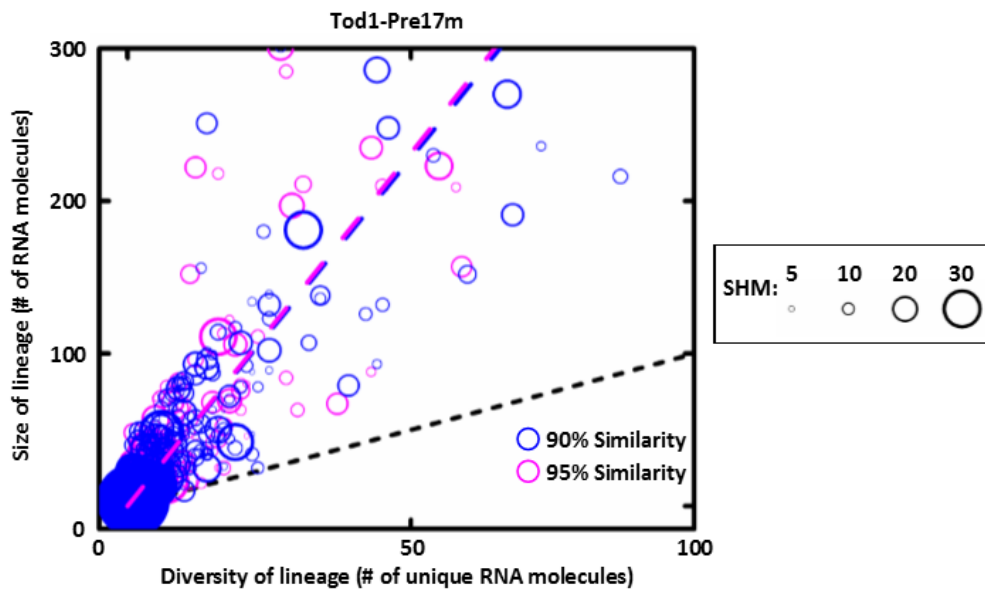

**Supplementary Figure 12** Comparison between different thresholds for lineage formation. 90% (blue) and 95% (pink) nucleotide similarities of the CDR3 region were used as the threshold to generate lineages. The distribution of the size vs diversity of lineages and the linear regressions (blue and pink dashed lines) of the lineage distributions generated by the two thresholds were compared. The area of the circle corresponds to the average SHM within the lineage. Black dotted line depicts  $y=x$  parity.

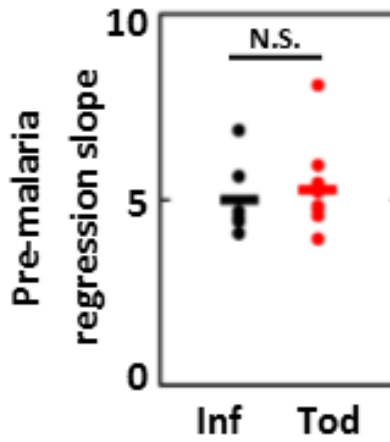

**Supplementary Figure 13** Pre-malaria lineage diversification between infants and toddlers. Pre-malaria lineage size/diversity linear regression slopes (Fig. 6a, blue dashed lines) were compared between infants (black) and toddlers (red). N.S. indicates not significant by Mann Whitney U test, two-tailed. Bars indicate means.

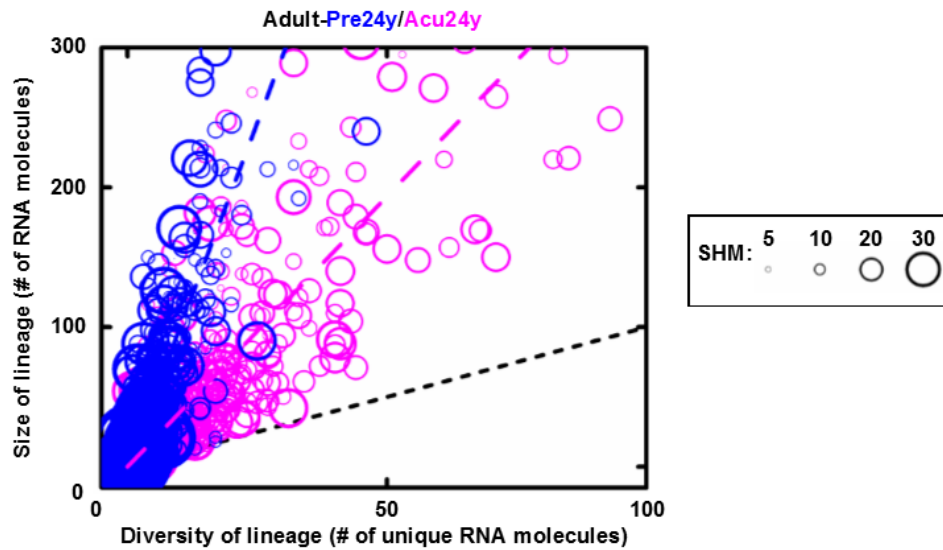

**Supplementary Figure 14** Adult B cell lineage diversification. Size and diversity of B cell lineages between pre-malaria (blue) and acute malaria (pink) samples for a 24 year old adult malaria patient. Area of the circles corresponds to the average number of mutations within that lineage. Dashed lines represent the linear fit for pre- (blue) and acute (pink) lineages; black dotted line depicts  $y=x$  parity. Both axes were trimmed to be consistent with the main figures.



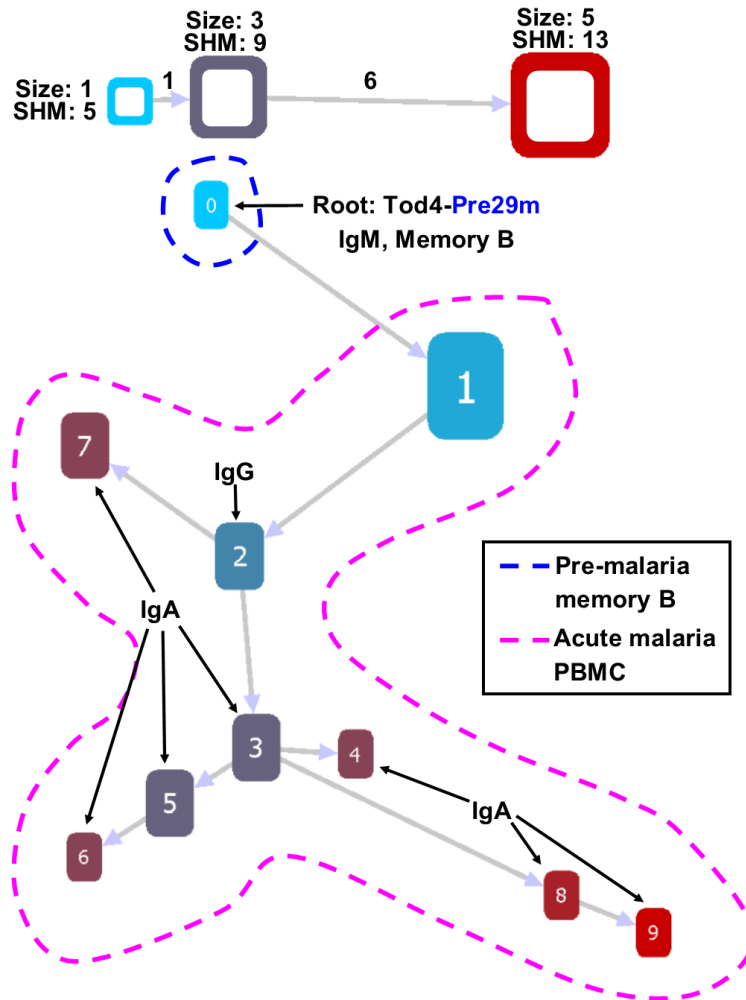

**Supplementary Figure 15** Multi-timepoint shared lineage example. Intra-lineage structure for a representative lineage from **Fig. 6**. Blue dashed curve encompasses the pre-malaria timepoint derived sequence, and pink dashed curve encompasses the acute malaria timepoint derived sequences. Each node is a unique RNA molecule species. The height of the node corresponds to the number of RNA molecules of the same species, the color corresponds to the SHM load, and the distance between nodes is proportional to the Levenshtein distance between the node sequences, as indicated in the legend above the lineage. Unlabeled node shares the isotype with the root.

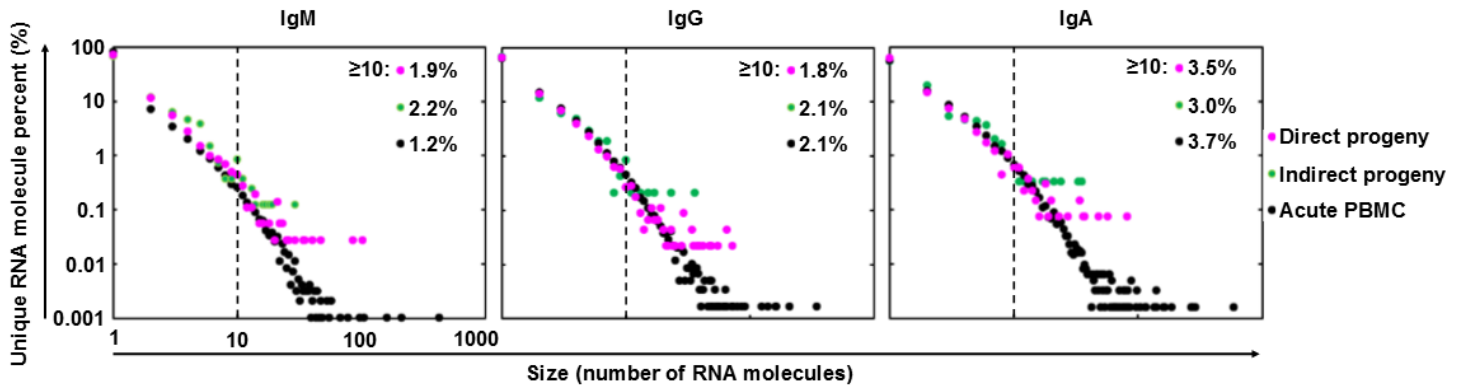

**Supplementary Figure 16** Pre-malaria memory B cells' acute progeny RNA abundance. Shared lineages containing sequences from pre-malaria memory B cells and acute malaria PBMCs were formed as in **Fig. 6c-f** and **Supplementary Fig. 16**. Acute sequences from these lineages were classified as direct progeny (pink, corresponding to pink box in **Fig. 6c**) if they can be traced directly back to a pre-malaria memory B cell sequence or indirect progeny (green, corresponding to acute sequences in the same lineages as the dark blue slice in **Fig. 6c**) if they cannot (i.e. they stem from a separate branch in the lineage tree). The RNA abundance distribution for these sequences were split by isotype and compared to the bulk acute PBMCs (black) from the same individuals (N=8 toddlers, Tod5 was not included because there were insufficient cells for FACS sorting). Vertical dashed line indicates 10 RNA molecule cutoff, with the percentage of unique RNA molecules larger than this cutoff displayed in the top right corner of each panel.

a

|                    |                                                                                                                                                                 |
|--------------------|-----------------------------------------------------------------------------------------------------------------------------------------------------------------|
| Germline           | a g t g g t g g t t a c t a c t g g a g c t g g a t c c g c c a g c a c c c a g g g a a g g g c c t g g a g t g g a t t g g g t a c a t c t a t t a c a g t g g |
| 0 Inf-Acu11m, IgG  | . . . . .                                                                                                                                                       |
| 1 Inf-Acu11m, IgA  | . . . . .                                                                                                                                                       |
| 2 Inf-Acu11m, IgA  | . . . . .                                                                                                                                                       |
| 3 Inf-Acu11m, IgG  | . . . . .                                                                                                                                                       |
| 4 Inf-Acu11m, IgG  | . . . . . a . . . . .                                                                                                                                           |
| 5 Inf-Acu11m, IgG  | . . . . . a . . . . .                                                                                                                                           |
| 6 Inf-Acu11m, IgG  | . . . . .                                                                                                                                                       |
| 7 Inf-Acu11m, IgG  | . . . . . a . . . . . a . . . . .                                                                                                                               |
| 8 Inf-Acu11m, IgA  | . . . . .                                                                                                                                                       |
| 9 Inf-Acu11m, IgA  | . . . . . c . . . . .                                                                                                                                           |
| 10 Inf-Acu11m, IgG | . . . . . a . . . . . c . . . . .                                                                                                                               |
| 11 Inf-Acu11m, IgA | . . . . . g . . . . .                                                                                                                                           |
| Germline           | g a g c a c c t a c t a c a a c c c g t c c c t c a a g a g t c g a g t t a c c a t a t c a g t a g a c a c g t c t a a g a a c c a g t t c t c c c t g a a g c |
| 0 Inf-Acu11m, IgG  | . . . . .                                                                                                                                                       |
| 1 Inf-Acu11m, IgA  | . . . . .                                                                                                                                                       |
| 2 Inf-Acu11m, IgA  | . . . . . a . . . . .                                                                                                                                           |
| 3 Inf-Acu11m, IgG  | . . . . . g . . . . .                                                                                                                                           |
| 4 Inf-Acu11m, IgG  | . . . . .                                                                                                                                                       |
| 5 Inf-Acu11m, IgG  | . . . . .                                                                                                                                                       |
| 6 Inf-Acu11m, IgG  | . . . . . g . . . . .                                                                                                                                           |
| 7 Inf-Acu11m, IgG  | . . . . .                                                                                                                                                       |
| 8 Inf-Acu11m, IgA  | . . . . . g . . . . .                                                                                                                                           |
| 9 Inf-Acu11m, IgA  | . . . . . g . . . . . c . . . . . t . . . . .                                                                                                                   |
| 10 Inf-Acu11m, IgG | . . . . . g . . . . .                                                                                                                                           |
| 11 Inf-Acu11m, IgA | . . . . . g . . . . .                                                                                                                                           |
| Germline           | t g a g c t c t g t g a c t g c c g c g g a c a c g g c c g t g t a t t a c . . . . .                                                                           |
| 0 Inf-Acu11m, IgG  | . . . . .                                                                                                                                                       |
| 1 Inf-Acu11m, IgA  | . . . . .                                                                                                                                                       |
| 2 Inf-Acu11m, IgA  | . . . . .                                                                                                                                                       |
| 3 Inf-Acu11m, IgG  | . . . . .                                                                                                                                                       |
| 4 Inf-Acu11m, IgG  | . . . . .                                                                                                                                                       |
| 5 Inf-Acu11m, IgG  | . . . . .                                                                                                                                                       |
| 6 Inf-Acu11m, IgG  | . . . . . a . . . . .                                                                                                                                           |
| 7 Inf-Acu11m, IgG  | . . . . .                                                                                                                                                       |
| 8 Inf-Acu11m, IgA  | . . . . .                                                                                                                                                       |
| 9 Inf-Acu11m, IgA  | . . . . .                                                                                                                                                       |
| 10 Inf-Acu11m, IgG | . . . . .                                                                                                                                                       |
| 11 Inf-Acu11m, IgA | . . . . . g . . . . . t . . . . . t . . . . . t . . . . .                                                                                                       |
| Germline           |                                                                                                                                                                 |
| 0 Inf-Acu11m, IgG  | g g c c a g g g a a c c c t g g t c a c c g t c t c c t c a . . . . .                                                                                           |
| 1 Inf-Acu11m, IgA  | . . . . .                                                                                                                                                       |
| 2 Inf-Acu11m, IgA  | . . . . .                                                                                                                                                       |
| 3 Inf-Acu11m, IgG  | . . . . .                                                                                                                                                       |
| 4 Inf-Acu11m, IgG  | . . . . .                                                                                                                                                       |
| 5 Inf-Acu11m, IgG  | . . . . .                                                                                                                                                       |
| 6 Inf-Acu11m, IgG  | . . . . .                                                                                                                                                       |
| 7 Inf-Acu11m, IgG  | . . . . .                                                                                                                                                       |
| 8 Inf-Acu11m, IgA  | . . . . .                                                                                                                                                       |
| 9 Inf-Acu11m, IgA  | . . . . .                                                                                                                                                       |
| 10 Inf-Acu11m, IgG | . . . . .                                                                                                                                                       |
| 11 Inf-Acu11m, IgA | . . . . .                                                                                                                                                       |

**b**

|                    |                                                                                                                                                                 |
|--------------------|-----------------------------------------------------------------------------------------------------------------------------------------------------------------|
| Germline           | t g g g t g c g a c a g g c c c c t g g a c a a g g g c t t g a g t g g a t g g g a t g g a t c a g c g c t t a c a a t g g t a a c a c a a c t a t g c a c a   |
| 0 Inf3-Acu11m, IgA | . . . . . g . . . . . a . . . . . g . . . . . g . . . . . a . . . . .                                                                                           |
| 1 Inf3-Acu11m, IgG | . . . . . g . . . . . g . a . . . . . g . . . . . g . . . . . a . . . . .                                                                                       |
| 2 Inf3-Acu11m, IgG | . . . . . g . . . . . a . . . . . g . . . . . c . . . . . a . . . . .                                                                                           |
| 3 Inf3-Acu11m, IgA | . . . . . g . . . . . a . . . . . g . . . . . g . . . . . a . . . . .                                                                                           |
| 4 Inf3-Acu11m, IgG | . . . . . g . . . . . a . . . . . g . . . . . g . a c . . . . . a . . . . .                                                                                     |
| 5 Inf3-Acu11m, IgA | . . . . . g . . . . . a . . . . . g . . . . . g . a . . . . . a . . . . . c . . . . .                                                                           |
| 6 Inf3-Acu11m, IgG | . . . . . g . . . . . a . . . . . g . . . . . t . . . . . a c . . . . . a . . . . .                                                                             |
| 7 Inf3-Acu11m, IgA | . . . . . g . . . . . a . . . . . a . . . . . a . . . . . g . . . . . t . . . . . g . . . . .                                                                   |
| Germline           | g a a g c t c c a g g g c a g a g t c a c c a t g a c c a c a g a c a c a t c c a c g a g c a c a g c c t a c a t g g a g c t g a g g a g c c t g a g a t c t g |
| 0 Inf3-Acu11m, IgA | . . . . . a . . . . . g . . . . . t . . . . .                                                                                                                   |
| 1 Inf3-Acu11m, IgG | . . . . . a . . . . . g . . . . . t . . . . .                                                                                                                   |
| 2 Inf3-Acu11m, IgG | . . . . . a . . . . . c . . . . . g . . . . . t . . . . .                                                                                                       |
| 3 Inf3-Acu11m, IgA | . . . . . a . . . . . g . . . . . t . t . . . . . t . . . . . a . . . . . a . . . . .                                                                           |
| 4 Inf3-Acu11m, IgG | . . . . . a . . . . . g . . . . . g . . . . . t . . . . . t . . . . .                                                                                           |
| 5 Inf3-Acu11m, IgA | . . . . . a . . . . . g . . . . . t . . . . . a a . . . . . a . . . . .                                                                                         |
| 6 Inf3-Acu11m, IgG | . . . . . a . . . . . g . . . . . g . . . . . t . . . . . t . . . . .                                                                                           |
| 7 Inf3-Acu11m, IgA | . . . . . a . . . . . a . . . . . g . . . . . g . . . . . t . . . . . c . . . . . c . . . . .                                                                   |
| Germline           | a c g a c a c g g c c g t g t a t t a c                                                                                                                         |
| 0 Inf3-Acu11m, IgA | . . . . . t . . . . .                                                                                                                                           |
| 1 Inf3-Acu11m, IgG | . . . . . c . . . . .                                                                                                                                           |
| 2 Inf3-Acu11m, IgG | . . . . . a . . . . . t . . . . .                                                                                                                               |
| 3 Inf3-Acu11m, IgA | . . . . . . . . . . .                                                                                                                                           |
| 4 Inf3-Acu11m, IgG | . . . . . . . . . . .                                                                                                                                           |
| 5 Inf3-Acu11m, IgA | . . . . . . . . . . .                                                                                                                                           |
| 6 Inf3-Acu11m, IgG | . . . . . . . . . . .                                                                                                                                           |
| 7 Inf3-Acu11m, IgA | . . . . . . . . . . .                                                                                                                                           |
| Germline           | g g c c a g g g a a c c c t g g t c a c c g t c t c c t c a                                                                                                     |
| 0 Inf3-Acu11m, IgA | . . . . .                                                                                                                                                       |
| 1 Inf3-Acu11m, IgG | . . . . .                                                                                                                                                       |
| 2 Inf3-Acu11m, IgG | . . . . . g . . . . .                                                                                                                                           |
| 3 Inf3-Acu11m, IgA | . . . . .                                                                                                                                                       |
| 4 Inf3-Acu11m, IgG | . . . . .                                                                                                                                                       |
| 5 Inf3-Acu11m, IgA | . . . . .                                                                                                                                                       |
| 6 Inf3-Acu11m, IgG | . . . . .                                                                                                                                                       |
| 7 Inf3-Acu11m, IgA | . . . . .                                                                                                                                                       |

**c**

|   |                  |                                                                                                                                                                 |
|---|------------------|-----------------------------------------------------------------------------------------------------------------------------------------------------------------|
|   | Germline         | c a c t g g g t c c g c c a g g c t t c c g g g a a a g g g c t g g a g t g g g t t g g c c g t a t t a g a a g c a a a g c t a a c a g t t a c g c g a c a g c |
| 0 | Tod4-Pre29m, IgM | .....                                                                                                                                                           |
| 1 | Tod4-Acu32m, IgM | .....                                                                                                                                                           |
| 2 | Tod4-Acu32m, IgG | .....                                                                                                                                                           |
| 3 | Tod4-Acu32m, IgA | .....                                                                                                                                                           |
| 4 | Tod4-Acu32m, IgA | .....                                                                                                                                                           |
| 5 | Tod4-Acu32m, IgA | .....                                                                                                                                                           |
| 6 | Tod4-Acu32m, IgA | .....                                                                                                                                                           |
| 7 | Tod4-Acu32m, IgA | .....                                                                                                                                                           |
| 8 | Tod4-Acu32m, IgA | .....                                                                                                                                                           |
| 9 | Tod4-Acu32m, IgA | .....                                                                                                                                                           |
|   | Germline         | a t a t g c t g c g t c g g t g a a a g g c a g g t t c a c c a t c t c c a g a g a t g a t t c a a a g a a c a c g g c g t a t c t g c a a a t g a a c a g c c |
| 0 | Tod4-Pre29m, IgM | .. t c . . . . . c . . . . . g . . . . . f . . . . . g . . . . .                                                                                                |
| 1 | Tod4-Acu32m, IgM | .. t c . . . . . g . . . . . f . . . . .                                                                                                                        |
| 2 | Tod4-Acu32m, IgG | .. t c . . . . . c . . . . . f . . . . .                                                                                                                        |
| 3 | Tod4-Acu32m, IgA | .. t c . . . . . c . . . . . t . . . . . t . . . . .                                                                                                            |
| 4 | Tod4-Acu32m, IgA | .. t c . . . . . c . . . . . f . . . . . t . . . . .                                                                                                            |
| 5 | Tod4-Acu32m, IgA | .. t c . . . . . c . . . . . f . . . . . t . . . . .                                                                                                            |
| 6 | Tod4-Acu32m, IgA | .. t c . . . . . c . . . . . t . . . . . t . . . . .                                                                                                            |
| 7 | Tod4-Acu32m, IgA | .. t c . . . . . c . . . . . f . . . . . t . . . . .                                                                                                            |
| 8 | Tod4-Acu32m, IgA | .. t c . . . . . a c . . . . . t . . . . .                                                                                                                      |
| 9 | Tod4-Acu32m, IgA | .. t c . . . . . a c . . . . . t . . . . . f . . . . . c . . . . .                                                                                              |
|   | Germline         | t g a a a a c c g a g g a c a c g g c c g t g t a t t a c                                                                                                       |
| 0 | Tod4-Pre29m, IgM | .....                                                                                                                                                           |
| 1 | Tod4-Acu32m, IgM | .....                                                                                                                                                           |
| 2 | Tod4-Acu32m, IgG | ..... a ..... g ..... g .....                                                                                                                                   |
| 3 | Tod4-Acu32m, IgA | ..... a ..... g ..... g .....                                                                                                                                   |
| 4 | Tod4-Acu32m, IgA | ..... a ..... t ..... g ..... g .....                                                                                                                           |
| 5 | Tod4-Acu32m, IgA | ..... a ..... g ..... g .....                                                                                                                                   |
| 6 | Tod4-Acu32m, IgA | ..... a ..... g ..... g .....                                                                                                                                   |
| 7 | Tod4-Acu32m, IgA | ..... a ..... g ..... g .....                                                                                                                                   |
| 8 | Tod4-Acu32m, IgA | ..... a ..... a c ..... g ..... g .....                                                                                                                         |
| 9 | Tod4-Acu32m, IgA | ..... a ..... a c ..... g ..... g .....                                                                                                                         |
|   | Germline         | g g c c a g g g a a c c c t g g t c a c c g t c t c t c a                                                                                                       |
| 0 | Tod4-Pre29m, IgM | .....                                                                                                                                                           |
| 1 | Tod4-Acu32m, IgM | .....                                                                                                                                                           |
| 2 | Tod4-Acu32m, IgG | .....                                                                                                                                                           |
| 3 | Tod4-Acu32m, IgA | .....                                                                                                                                                           |
| 4 | Tod4-Acu32m, IgA | .....                                                                                                                                                           |
| 5 | Tod4-Acu32m, IgA | .....                                                                                                                                                           |
| 6 | Tod4-Acu32m, IgA | .....                                                                                                                                                           |
| 7 | Tod4-Acu32m, IgA | ..... a .....                                                                                                                                                   |
| 8 | Tod4-Acu32m, IgA | .....                                                                                                                                                           |
| 9 | Tod4-Acu32m, IgA | .....                                                                                                                                                           |

**Supplementary Figure 17** Sequence alignment for illustrated lineages. The CDR3 region has been highlighted in yellow. The top row displays the IMGT germline allele sequence, and dashes indicate where the sequences are identical to the germline. (a) Corresponds to the lineage in **Fig. 5b**, (b) corresponds to the lineage in **Fig. 5c**, and (c) corresponds to the lineage in **Supplementary Fig. 15**.



## Supplementary Tables

**Supplementary Table 1** Primers used for antibody sequence library generation.

| <b>Primer name</b>                                                | <b>Sequence (5'-3')</b>                                                 |
|-------------------------------------------------------------------|-------------------------------------------------------------------------|
| <b>RT primers</b>                                                 |                                                                         |
| IgG                                                               | ACACTCTTTCCTACACGACGCTCTTCCGATCTNNNNNNNNNNNNNA<br>AGACCGATGGGGCCCTTG    |
| IgA                                                               | ACACTCTTTCCTACACGACGCTCTTCCGATCTNNNNNNNNNNNNNG<br>AAGACCTTGGGGCTGGT     |
| IgM                                                               | ACACTCTTTCCTACACGACGCTCTTCCGATCTNNNNNNNNNNNNNG<br>GGAATTCTCACAGGAGACG   |
| IgE                                                               | ACACTCTTTCCTACACGACGCTCTTCCGATCTNNNNNNNNNNNNNG<br>AAGACGGATGGGGCTCTGT   |
| IgD                                                               | ACACTCTTTCCTACACGACGCTCTTCCGATCTNNNNNNNNNNNNNG<br>GGTGTCTGCACCCTGATA    |
| <b>1<sup>st</sup> PCR forward primers</b>                         |                                                                         |
| ILLUPE2LR1                                                        | GACGTGTGCTCTTCCGATCTCGCAGACCCTCTCACTCAC                                 |
| ILLUPE2LR2                                                        | GACGTGTGCTCTTCCGATCTTGGAGCTGAGGTGAAGAAGC                                |
| ILLUPE2LR3                                                        | GACGTGTGCTCTTCCGATCTTGAATCTGGGTCTGAGTTG                                 |
| ILLUPE2LR4                                                        | GACGTGTGCTCTTCCGATCTGGCTCAGGACTGGTGAAGC                                 |
| ILLUPE2LR5                                                        | GACGTGTGCTCTTCCGATCTTGGAGCAGAGGTGAAAAGC                                 |
| ILLUPE2LR6                                                        | GACGTGTGCTCTTCCGATCTGGTGCAGCTGTTGGAGTCT                                 |
| ILLUPE2LR7                                                        | GACGTGTGCTCTTCCGATCTACTGTTGAAGCCTTCGGAGA                                |
| ILLUPE2LR8                                                        | GACGTGTGCTCTTCCGATCTAAACCCACACAGACCCTCAC                                |
| ILLUPE2LR9                                                        | GACGTGTGCTCTTCCGATCTAGTCTGGGGCTGAGGTGAAG                                |
| ILLUPE2LR10                                                       | GACGTGTGCTCTTCCGATCTGGCCCAGGACTGGTGAAG                                  |
| ILLUPE2LR11                                                       | GACGTGTGCTCTTCCGATCTGGTGCAGCTGGTGGAGTC                                  |
| 1 <sup>st</sup> PCR reverse primer                                |                                                                         |
| ILLUPE1adaptor_short                                              | ACACTCTTTCCTACACGAC                                                     |
| 2 <sup>nd</sup> PCR reverse primer                                |                                                                         |
| ILLUPE1adaptor                                                    | AATGATACGGCGACCACCGAGATCTACACTCTTTCCTACACGAC                            |
| <b>2<sup>nd</sup> PCR forward primers with 7 library barcodes</b> |                                                                         |
| ILLUPE2TSBC21                                                     | CAAGCAGAAGACGGCATAACGAGATAACGAAACGTGACTGGAGTTC<br>AGACGTGTGCTCTTCCGATCT |
| ILLUPE2TSBC22                                                     | CAAGCAGAAGACGGCATAACGAGATAACGTACGGTGACTGGAGTTC<br>AGACGTGTGCTCTTCCGATCT |
| ILLUPE2TSBC23                                                     | CAAGCAGAAGACGGCATAACGAGATAAACCCTCGTGACTGGAGTTC<br>AGACGTGTGCTCTTCCGATCT |
| ILLUPE2TSBC25                                                     | CAAGCAGAAGACGGCATAACGAGATAAATCAGTGTGACTGGAGTTC<br>AGACGTGTGCTCTTCCGATCT |
| ILLUPE2TSBC26                                                     | CAAGCAGAAGACGGCATAACGAGATAAGCTCATGTGACTGGAGTTC<br>AGACGTGTGCTCTTCCGATCT |
| ILLUPE2TSBC27                                                     | CAAGCAGAAGACGGCATAACGAGATAAAGGAATGTGACTGGAGTTC<br>AGACGTGTGCTCTTCCGATCT |
| ILLUPE2TSBC28                                                     | CAAGCAGAAGACGGCATAACGAGATAACTTTTGGTGACTGGAGTTC<br>AGACGTGTGCTCTTCCGATCT |

**Supplementary Table 2** Sequencing read statistics for control libraries.

| <b>Library</b>                                    | <b>Number of cells</b> | <b>Number of raw reads</b> | <b>Number of merged reads</b> | <b>Number of Ig reads</b> | <b>Number of reads truncated to 320bp</b> | <b>Number of useful MID<sup>a</sup>s</b> | <b>Percentage of Reads in useful MID<sup>a</sup>s</b> | <b>Number of useful MID<sup>a</sup>s containing more than one sub-group<sup>b</sup></b> |
|---------------------------------------------------|------------------------|----------------------------|-------------------------------|---------------------------|-------------------------------------------|------------------------------------------|-------------------------------------------------------|-----------------------------------------------------------------------------------------|
| Libraries for naive B cells from healthy controls | 1,000                  | 46,320                     | 22,742                        | 9,201                     | 9,149                                     | 797                                      | 94.30                                                 | 1                                                                                       |
|                                                   | 2,000                  | 44,846                     | 18,602                        | 17,421                    | 17,267                                    | 2,176                                    | 93.29                                                 | 2                                                                                       |
|                                                   | 10,000                 | 228,711                    | 99,370                        | 62,242                    | 61,121                                    | 7,102                                    | 94.73                                                 | 9                                                                                       |
|                                                   | 20,000                 | 293,279                    | 196,570                       | 184,754                   | 182,818                                   | 23,991                                   | 93.27                                                 | 49                                                                                      |
|                                                   | 100,000                | 1,153,763                  | 1,074,771                     | 1,048,523                 | 1,041,048                                 | 165,663                                  | 92.63                                                 | 1,137                                                                                   |
|                                                   | 200,000                | 2,191,738                  | 2,107,762                     | 2,059,944                 | 2,045,047                                 | 404,225                                  | 91.41                                                 | 7,239                                                                                   |
|                                                   | 1,000,000              | 7,494,809                  | 7,342,163                     | 7,258,253                 | 7,207,962                                 | 1,516,098                                | 86.44                                                 | 108,172                                                                                 |

<sup>a</sup> A useful MID has more than two reads. If there are only two reads in a MID, they are discarded unless they are identical.

<sup>b</sup> The number of MID<sup>a</sup>s containing more than one type of antibody heavy chain transcripts.



**Supplementary Table 3** Cohort and cell type availability.

| Patient | Pre-malaria  |          |      |          | Acute malaria |           |      |
|---------|--------------|----------|------|----------|---------------|-----------|------|
|         | Pre-Index    | Pre- Age | PBMC | Memory B | Acute-Index   | Acute Age | PBMC |
| Inf1    | Inf1-Pre3m   | 3m       | Yes  | I.S.     | Inf1-Acu9m    | 9m        | Yes  |
| Inf2    | Inf2-Pre3m   | 3m       | Yes  | J.F.     | Inf2-Acu6m    | 6m        | Yes  |
| Inf3    | Inf3-Pre5m   | 5m       | Yes  | I.S.     | Inf3-Acu11m   | 11m       | Yes  |
| Inf4    | Inf4-Pre5m   | 5m       | Yes  | J.F.     | Inf4-Acu10m   | 10m       | Yes  |
| Inf5*   | Inf5-Pre5m   | 5m       | Yes  | J.F.     | Inf5-Acu10m   | 10m       | Yes  |
| Inf6    | Inf6-Pre8m   | 8m       | Yes  | J.F.     | Inf6-Acu12m   | 12m       | Yes  |
| Inf7    | Inf7-Pre11m  | 11m      | Yes  | Yes      | N.A.          | N.A.      | N.A. |
| Inf8    | Inf8-Pre11m  | 11m      | Yes  | Yes      | N.A.          | N.A.      | N.A. |
| Inf9    | Inf9-Pre11m  | 11m      | Yes  | Yes      | N.A.          | N.A.      | N.A. |
| Inf10   | Inf10-Pre11m | 11m      | Yes  | Yes      | N.A.          | N.A.      | N.A. |
| Inf11   | Inf11-Pre11m | 11m      | Yes  | Yes      | N.A.          | N.A.      | N.A. |
| Tod1*   | Tod1-Pre17m  | 17m      | Yes  | Yes      | Tod1-Acu22m   | 22m       | Yes  |
| Tod2    | Tod2-Pre19m  | 19m      | Yes  | Yes      | Tod2-Acu22m   | 22m       | Yes  |
| Tod3†   | Tod3-Pre28m  | 28m      | Yes  | Yes      | Tod3-Acu32m   | 32m       | Yes  |
| Tod4    | Tod4-Pre29m  | 29m      | Yes  | Yes      | Tod4-Acu32m   | 32m       | Yes  |
| Tod5    | Tod5-Pre31m  | 31m      | Yes  | J.F.     | Tod5-Acu32m   | 32m       | Yes  |
| Tod6    | Tod6-Pre31m  | 31m      | Yes  | Yes      | Tod6-Acu38m   | 38m       | Yes  |
| Tod7†   | Tod7-Pre40m  | 40m      | Yes  | Yes      | Tod7-Acu42m   | 42m       | Yes  |
| Tod8    | Tod8-Pre42m  | 42m      | Yes  | Yes      | Tod8-Acu46m   | 46m       | Yes  |
| Tod9    | Tod9-Pre47m  | 47m      | Yes  | Yes      | Tod9-Acu50m   | 50m       | Yes  |
| Tod10   | Tod10-Pre13m | 13m      | Yes  | Yes      | N.A.          | N.A.      | N.A. |
| Tod11   | Tod11-Pre16m | 16m      | Yes  | Yes      | N.A.          | N.A.      | N.A. |
| Tod12   | Tod12-Pre17m | 17m      | Yes  | Yes      | N.A.          | N.A.      | N.A. |
| Tod13   | Tod13-Pre17m | 17m      | Yes  | Yes      | N.A.          | N.A.      | N.A. |

I.S. indicates insufficient PBMC for FACS sorting or analysis.

J.F. indicates just flow cytometry analysis.

N.A indicates samples were not available.

\* Same individual

† Same individual

**Supplementary Table 4** Sequencing read statistics of paired PBMCs from the malaria cohort.

| <b>Sample</b> | <b>PBMCs<sup>a</sup></b> | <b>Raw reads</b> | <b>Mapped reads</b> | <b>Percent Mapped</b> | <b>Unique RNA molecules</b> |
|---------------|--------------------------|------------------|---------------------|-----------------------|-----------------------------|
| Inf1-Pre3m    | 3,000,000                | 3,246,180        | 2,989,252           | 92.1%                 | 41,842                      |
| Inf1-Acu9m    | 3,000,000                | 3,608,436        | 3,348,589           | 92.8%                 | 32,800                      |
| Inf2-Pre3m    | 3,000,000                | 3,176,623        | 2,987,587           | 94.0%                 | 35,379                      |
| Inf2-Acu6m    | 3,000,000                | 3,689,115        | 3,481,675           | 94.4%                 | 29,523                      |
| Inf3-Pre5m    | 4,150,000                | 3,242,619        | 3,070,458           | 94.7%                 | 37,234                      |
| Inf3-Acu11m   | 5,000,000                | 4,396,739        | 4,153,830           | 94.5%                 | 42,634                      |
| Inf4-Pre5m    | 5,000,000                | 3,048,762        | 2,810,018           | 92.2%                 | 45,445                      |
| Inf4-Acu10m   | 3,700,000                | 5,287,767        | 4,864,629           | 92.0%                 | 29,694                      |
| Inf5-Pre5m*   | 5,000,000                | 3,764,663        | 3,425,015           | 91.0%                 | 54,516                      |
| Inf5-Acu10m*  | 50,00,000                | 4,712,120        | 4,374,600           | 92.8%                 | 41,774                      |
| Inf6-Pre8m    | 5,000,000                | 3,588,177        | 3,456,165           | 96.3%                 | 47,254                      |
| Inf6-Acu12m   | 400,000                  | 395,765          | 378,182             | 95.6%                 | 03,447                      |
| Tod1-Pre17m*  | 5,000,000                | 2,816,309        | 2,576,372           | 91.5%                 | 53,551                      |
| Tod1-Acu22m*  | 1,380,000                | 2,811,617        | 2,593,849           | 92.3%                 | 12,514                      |
| Tod2-Pre19m   | 5,000,000                | 4,842,338        | 4,673,875           | 96.5%                 | 40,600                      |
| Tod2-Acu22m   | 1,920,000                | 1,956,906        | 1,886,521           | 96.4%                 | 15,285                      |
| Tod3-Pre28m†  | 5,000,000                | 3,988,677        | 3,687,883           | 92.5%                 | 35,567                      |
| Tod3-Acu32m†  | 5,000,000                | 9,218,255        | 8,565,149           | 92.9%                 | 47,144                      |
| Tod4-Pre29m   | 5,000,000                | 2,924,629        | 2,851,964           | 97.5%                 | 48,950                      |
| Tod4-Acu32m   | 5,000,000                | 4,004,416        | 3,846,197           | 96.0%                 | 40,628                      |
| Tod5-Pre31m   | 5,000,000                | 5,338,867        | 5,126,888           | 96.0%                 | 31,531                      |
| Tod5-Acu32m   | 3,000,000                | 2,853,984        | 2,736,902           | 95.9%                 | 26,955                      |
| Tod6-Pre31m   | 5,000,000                | 4,356,975        | 4,198,929           | 96.4%                 | 44,665                      |
| Tod6-Acu38m   | 2,170,000                | 5,738,001        | 5,460,964           | 95.2%                 | 22,270                      |
| Tod7-Pre40m†  | 5,000,000                | 3,192,503        | 2,893,482           | 90.6%                 | 34,901                      |
| Tod7-Acu42m†  | 4,740,000                | 4,448,008        | 4,079,432           | 91.7%                 | 34,185                      |
| Tod8-Pre42m   | 5,000,000                | 2,120,127        | 2,058,164           | 97.1%                 | 48,939                      |
| Tod8-Acu46m   | 2,100,000                | 2,060,234        | 1,986,239           | 96.4%                 | 17,039                      |
| Tod9-Pre47m   | 3,000,000                | 3,035,618        | 2,682,991           | 88.4%                 | 20,094                      |
| Tod9-Acu50m   | 3,000,000                | 4,678,879        | 3,912,981           | 83.6%                 | 18,447                      |

<sup>a</sup>Number of PBMCs differs because of the age dependent blood draw volume and cell recovery.

\* Same individual

† Same individual

**Supplementary Table 5** Percentage of unique RNA sequences assigned to novel alleles for each sample. Novel alleles detected by TIGGER and our method were combined.

| <b>Sample</b> | <b>Percentage of Unique RNA sequences assigned to novel germline alleles</b> |
|---------------|------------------------------------------------------------------------------|
| Inf1-Pre3m    | 4.81%                                                                        |
| Inf1-Acu9m    | 6.21%                                                                        |
| Inf2-Pre3m    | 8.44%                                                                        |
| Inf2-Acu6m    | 9.11%                                                                        |
| Inf3-Pre5m    | 1.78%                                                                        |
| Inf3-Acu11m   | 4.91%                                                                        |
| Inf4-Pre5m    | 11.83%                                                                       |
| Inf4-Acu10m   | 9.63%                                                                        |
| Inf5-Pre5m*   | 8.19%                                                                        |
| Inf5-Acu10m*  | 7.72%                                                                        |
| Inf6-Pre8m    | 6.02%                                                                        |
| Inf6-Acu12m   | 6.79%                                                                        |
| Tod1-Pre17m*  | 9.82%                                                                        |
| Tod1-Acu22m*  | 7.51%                                                                        |
| Tod2-Pre19m   | 2.54%                                                                        |
| Tod2-Acu22m   | 2.34%                                                                        |
| Tod3-Pre28m†  | 16.91%                                                                       |
| Tod3-Acu32m†  | 15.05%                                                                       |
| Tod4-Pre29m   | 3.61%                                                                        |
| Tod4-Acu32m   | 4.80%                                                                        |
| Tod5-Pre31m   | 6.98%                                                                        |
| Tod5-Acu32m   | 6.79%                                                                        |
| Tod6-Pre31m   | 5.89%                                                                        |
| Tod6-Acu38m   | 4.15%                                                                        |
| Tod7-Pre40m†  | 18.30%                                                                       |
| Tod7-Acu42m†  | 13.84%                                                                       |
| Tod8-Pre42m   | 7.40%                                                                        |
| Tod8-Acu46m   | 5.71%                                                                        |
| Tod9-Pre47m   | 13.10%                                                                       |
| Tod9-Acu50m   | 13.15%                                                                       |

\* Same individual

† Same individual

**Supplementary Table 6** Average mutation number of naïve B cells.

| <b>Sample</b> | <b>Number of naïve B cells</b> | <b>Average number of mutations</b> |
|---------------|--------------------------------|------------------------------------|
| Inf1-Acu9m    | 10000                          | 0.31                               |
| Inf2-Pre3m    | 10000                          | 0.20                               |
| Inf3-Pre5m    | 10000                          | 0.29                               |
| Inf4-Pre5m    | 10000                          | 0.27                               |
| Inf5-Pre5m*   | 10000                          | 0.40                               |
| Tod1-Pre17m*  | 10000                          | 0.79                               |
| Tod2-Pre19m   | 10000                          | 0.57                               |
| Tod3-Pre28m†  | 10000                          | 0.53                               |
| Tod4-Pre29m   | 100000                         | 1.07                               |
| Tod7-Pre40m†  | 10000                          | 0.45                               |
| Tod8-Pre42m   | 100000                         | 1.20                               |

\* Same individual

† Same individual

**Supplementary Table 7** Replacement and silent mutations and their ratio for PBMCs in infants and toddlers.

|                |              |     | FWR  |      |           | CDR  |      |           | Average R/S Ratio |             |
|----------------|--------------|-----|------|------|-----------|------|------|-----------|-------------------|-------------|
|                |              |     | R    | S    | R/S Ratio | R    | S    | R/S Ratio | FWR               | CDR         |
| <b>Infant</b>  | <b>Pre</b>   | IgM | 0.54 | 0.11 | 4.98      | 0.18 | 0.04 | 5.15      | 3.00 ± 1.12       | 5.54 ± 0.25 |
|                |              | IgG | 1.54 | 0.70 | 2.21      | 1.36 | 0.24 | 5.67      |                   |             |
|                |              | IgA | 1.48 | 0.65 | 2.28      | 1.29 | 0.22 | 5.75      |                   |             |
|                | <b>Acute</b> | IgM | 1.36 | 0.34 | 4.05      | 0.58 | 0.11 | 5.52      |                   |             |
|                |              | IgG | 1.88 | 0.85 | 2.22      | 1.62 | 0.30 | 5.35      |                   |             |
|                |              | IgA | 2.03 | 0.90 | 2.25      | 1.75 | 0.30 | 5.79      |                   |             |
| <b>Toddler</b> | <b>Pre</b>   | IgM | 1.12 | 0.35 | 3.20      | 0.58 | 0.11 | 5.54      | 2.41 ± 0.45       | 5.34 ± 0.25 |
|                |              | IgG | 3.42 | 1.57 | 2.17      | 2.73 | 0.54 | 5.05      |                   |             |
|                |              | IgA | 3.88 | 1.82 | 2.14      | 3.15 | 0.58 | 5.41      |                   |             |
|                | <b>Acute</b> | IgM | 2.16 | 0.79 | 2.73      | 1.33 | 0.24 | 5.44      |                   |             |
|                |              | IgG | 4.28 | 2.02 | 2.11      | 3.39 | 0.68 | 5.02      |                   |             |
|                |              | IgA | 4.33 | 2.04 | 2.12      | 3.55 | 0.64 | 5.59      |                   |             |

Nucleotide mutations resulting in amino acid substitutions (Replacement, R) or no amino acid substitutions (silent, S) in the framework region (FWR2 and 3) and complementary determining regions (CDR1 and 2) of infants (N=6) and toddlers (N=9), weighted by unique RNA molecules. CDR3 and FWR4 were not included in this analysis due to the difficulty determining the germline sequence. FWR1 for all sequences was also omitted because it was not covered entirely by some of the primers. Average displayed as mean ± standard deviation.

**Supplementary Table 8** Pre-malaria and acute malaria shared lineage count.

| Patient | Shared lineages | Unique memory B cell Sequences | Containing pre-malaria memory B cells |
|---------|-----------------|--------------------------------|---------------------------------------|
| Inf1    | 29              | N.A.                           | N.A.                                  |
| Inf2    | 131             | N.A.                           | N.A.                                  |
| Inf3    | 215             | N.A.                           | N.A.                                  |
| Inf4    | 142             | N.A.                           | N.A.                                  |
| Inf5    | 214             | N.A.                           | N.A.                                  |
| Inf6    | 83              | N.A.                           | N.A.                                  |
| Tod1    | 308             | 3,423                          | 149                                   |
| Tod2    | 385             | 7,856                          | 145                                   |
| Tod3†   | 1230            | 6,023                          | 926                                   |
| Tod4    | 1194            | 5,073                          | 209                                   |
| Tod5    | 260             | N.A.                           | N.A.                                  |
| Tod6    | 346             | 6,363                          | 111                                   |
| Tod7†   | 472             | 4,771                          | 161                                   |
| Tod8    | 581             | 2,399                          | 98                                    |
| Tod9    | 414             | 2,534                          | 135                                   |

The number of lineages containing sequences from both the pre-malaria and acute malaria timepoints. For malaria-experienced individuals with 10,000 FACS sorted pre-malaria memory B cells available, the number of unique memory B cell sequences and two-timepoint-shared lineages that contain sequences from the sorted memory B cells from the pre-malaria timepoint.

N.A. indicates not applicable

† Same individual
